# Supplementary material
Source: publisher figshare collection journal article supplement (https://future-science-group.figshare.com/ndownloader/files/34495775)
Supplement: Supplementary file 1 [file 34495775]

Supplementary Table 1. The list of primers used in gene identification or gene expression assay

| Gene | Product size (bp) | Primers | Reference(s) |
| --- | --- | --- | --- |
| K1 | 1046 | 5´-GTAGGTATTGCAAGCCATGC-3´ | [19] |
| 5´- GCCCAGGTTAATGAATCCGT-3´ |
| K2 | 1121 | 5´-GGAGCCATTTGAATTCGGTG-3´ | [19] |
| 5´-TCCCTAGCACTGGCTTAAGT-3´ |
| rmpA | 106 | 5´- AGAGTATTGGTTGACTGCAGGATTT -3´ | [23] |
| 5´- AAACATCAAGCCATATCCATTG -3´ |
| iucA | 82 | 5´- TCAATGGCTATTCCCGCTGC-3´ | This study |
| 5´- CCCTTTAGCGACAAGCTCCT-3´ |
| acrA | 101 | 5´-ATGTGACGATAAACCGGCTC-3´ | [242] |
| 5´-CTGGCAGTTCGGTGGTTATT-3´ |
| oqxA | 89 | 5´- GGCAAGAGCCAAAACGCAG-3´ | This study |
| 5´- CTTCACGGGAGACGAGGTTG-3´ |
| SHV | 426 | F5′-ACCTTTAAAGTAGTGCTCTGC-3′ | [21] |
| R5′-CACCATCCACTGCAGCAGCTG-3′ |
| TEM | 444 | F5′CGCCGCATACACTATTCTCAGAATGA-3′ | [20] |
| R5′-ACGCTCACCGGCTCCAGATTTAT-3′ |
| CTX-M | 593 | F5′-ATGTGCAGYACCAGTAARGTKATGGC-3 | [20] |
| R5′-TGGGTRAARTARGTSACCAGAAYCAGCGC-3 |
| IMP | 188 | F5′-GGAATAGAGTGGCTTAAYTCTC-3′ | [22] |
| R5′-CCA AACYACTASGTTATCT-3′ |
| VIM | 390 | F5′-GATGGTGTTTGGTCGCATA-3′ | [22] |
| R5′-CGAATGCGCAGCACCAG-3′ |
| KPC | 796 | F5′-CGTTCTTGTCTCTCATGGCC-3′ | [10] |
| R5′-CCTCGCTGTGCTTGTCATCC-3′ |
| OXA-48 | 743 | F5′-TTGGTGGCATCGATTATCGG-3′ | [10] |
| R5′-GAGCACTTCTTTTGTGATGGC-3′ |
| NDM | 621 | F5′- GGTTTGGCGATCTGGTTTTC-3′ | [10] |
| R5′-CGGAATGGCTCATCACGATC-3′ |
